# Supplementary material for: Identification of Three Novel Splicing Variants and Expression Analysis of Chicken GPR1 Gene
Source: Hindawi journal article supplement (doi:10.1155/2017/1074054), 2017-01-01
Supplement: f1 [file 1074054.f1.pdf]

Supplementary figure

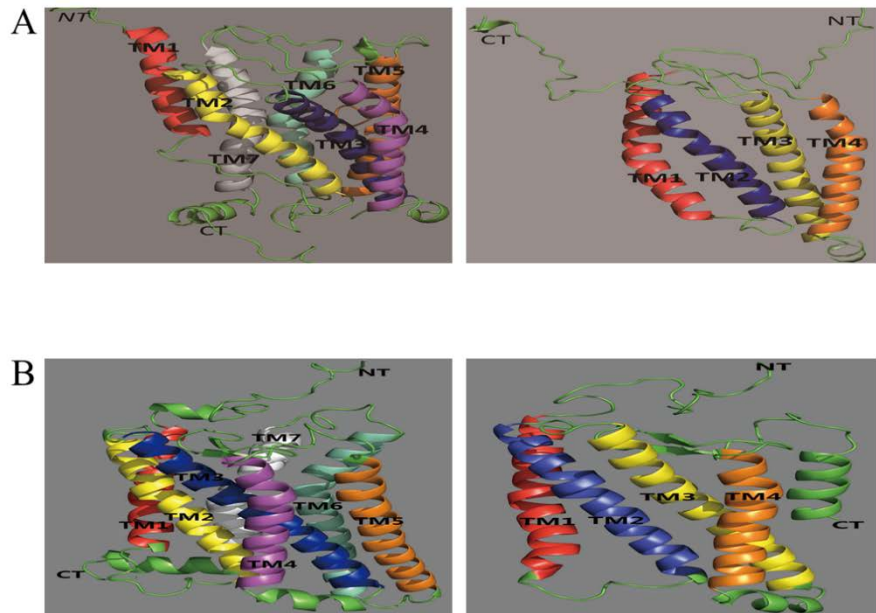

**Supplementary figure.1 I-TASSER and Rosseta to predict the 3D structure of GPR1.** The 7 transmembrane domain of proteins encoded by *GPR1-va* variants, and the 4 transmembrane domain of proteins encoded by *GPR1-vb* variants. (A) I-TASSER to predict the structure of GPR1. (B) Rosetta to predict the structure of GPR1.
